# Supplementary material for: A convenient analytic method for gel quantification using ImageJ paired with Python or R
Source: PubMed Central journal article supplement (PMC11581290; doi:10.1371/journal.pone.0308297), 2024-11-21

IVT\_37\_n1

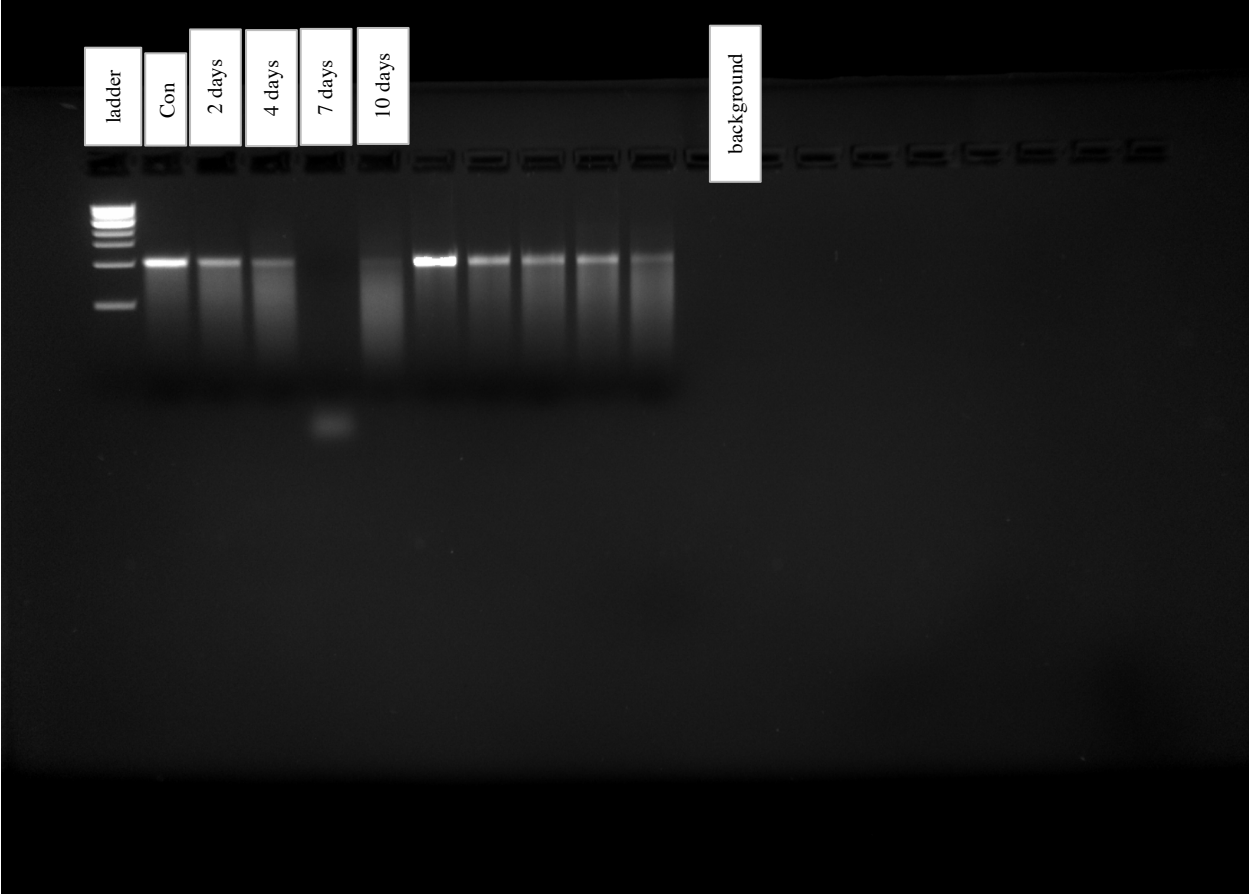

IVT\_37\_n2

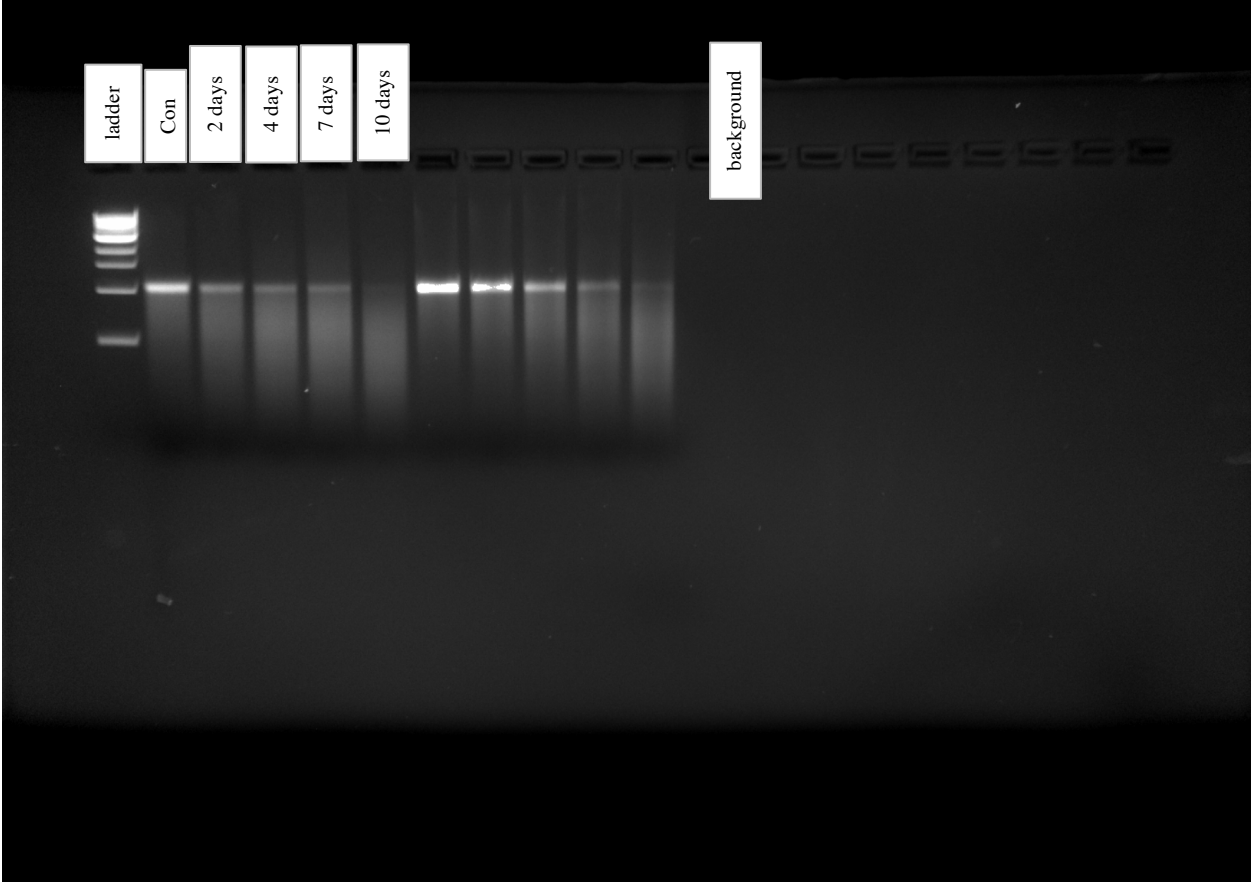

IVT\_37\_n3

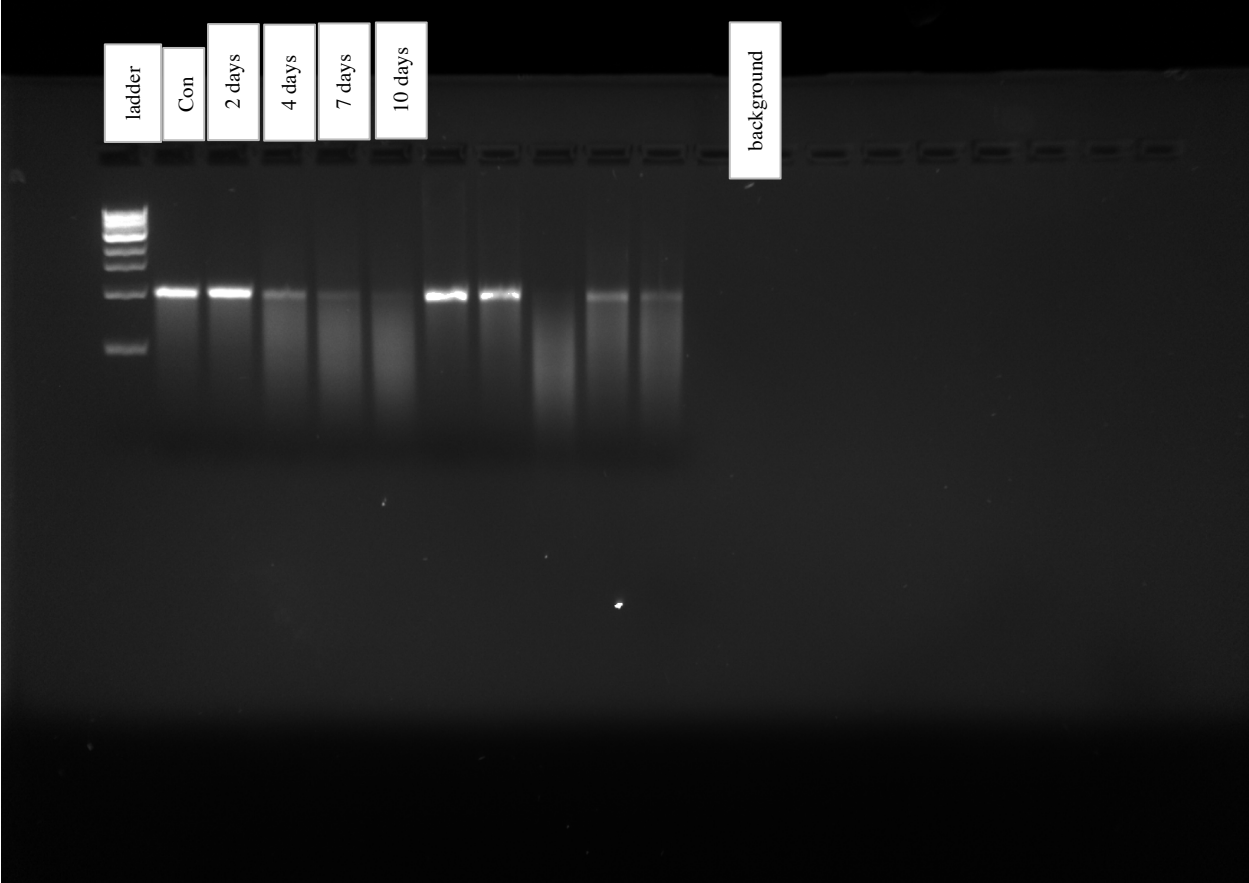

IVT\_Bioanalyzer - star indicating the lanes used for the mauuscript

Assay Class: Eukaryote Total RNA Nano  
Data Path: C:\...Eukaryote Total RNA Nano\_DE20901499\_2022-03-03\_15-03-01.xad

Created: 2022-03-03 15:03:01  
Modified: 2022-03-03 16:10:57

Gel Image

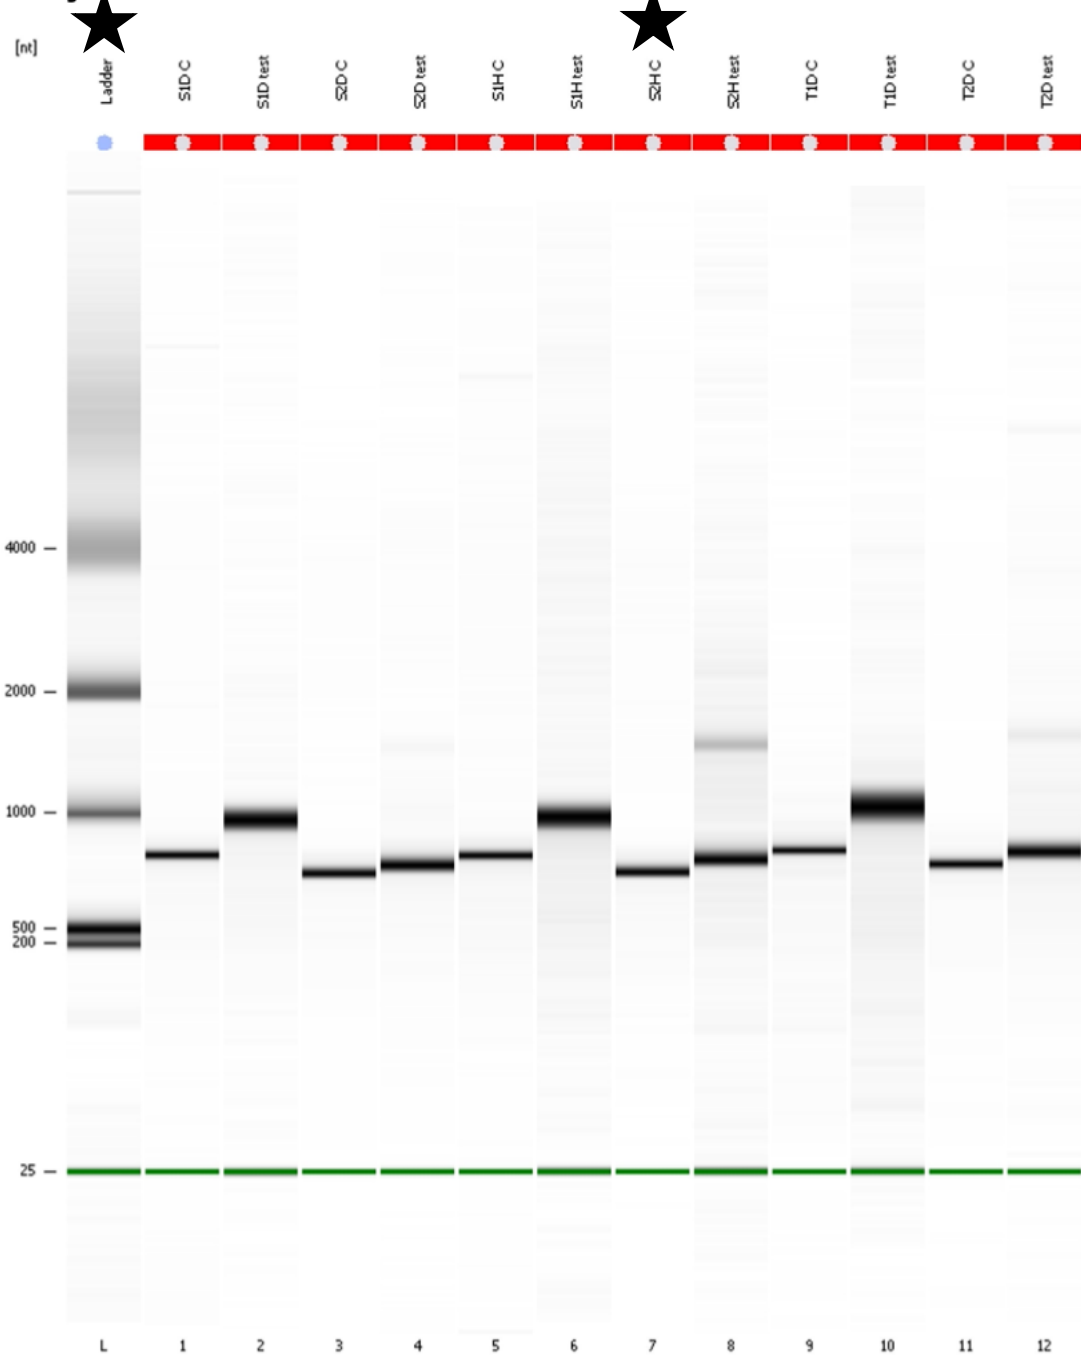

IVT\_Gel\_corresponding\_to\_Bioanalyzer

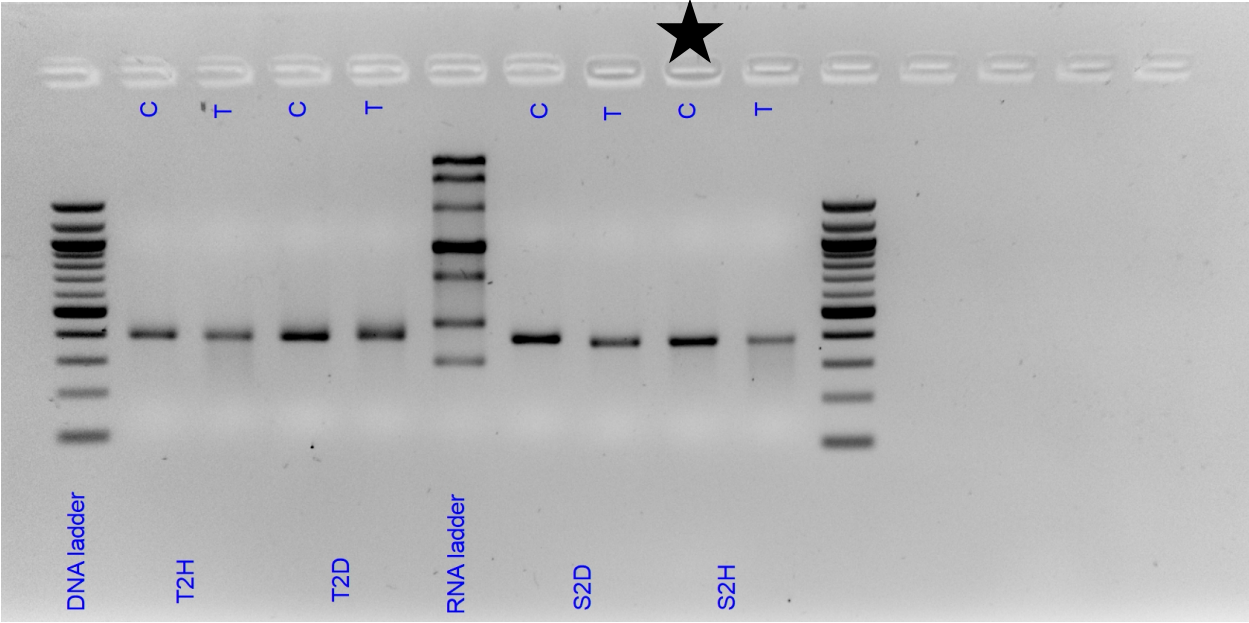

Tot\_RNA\_gel\_37C\_R1

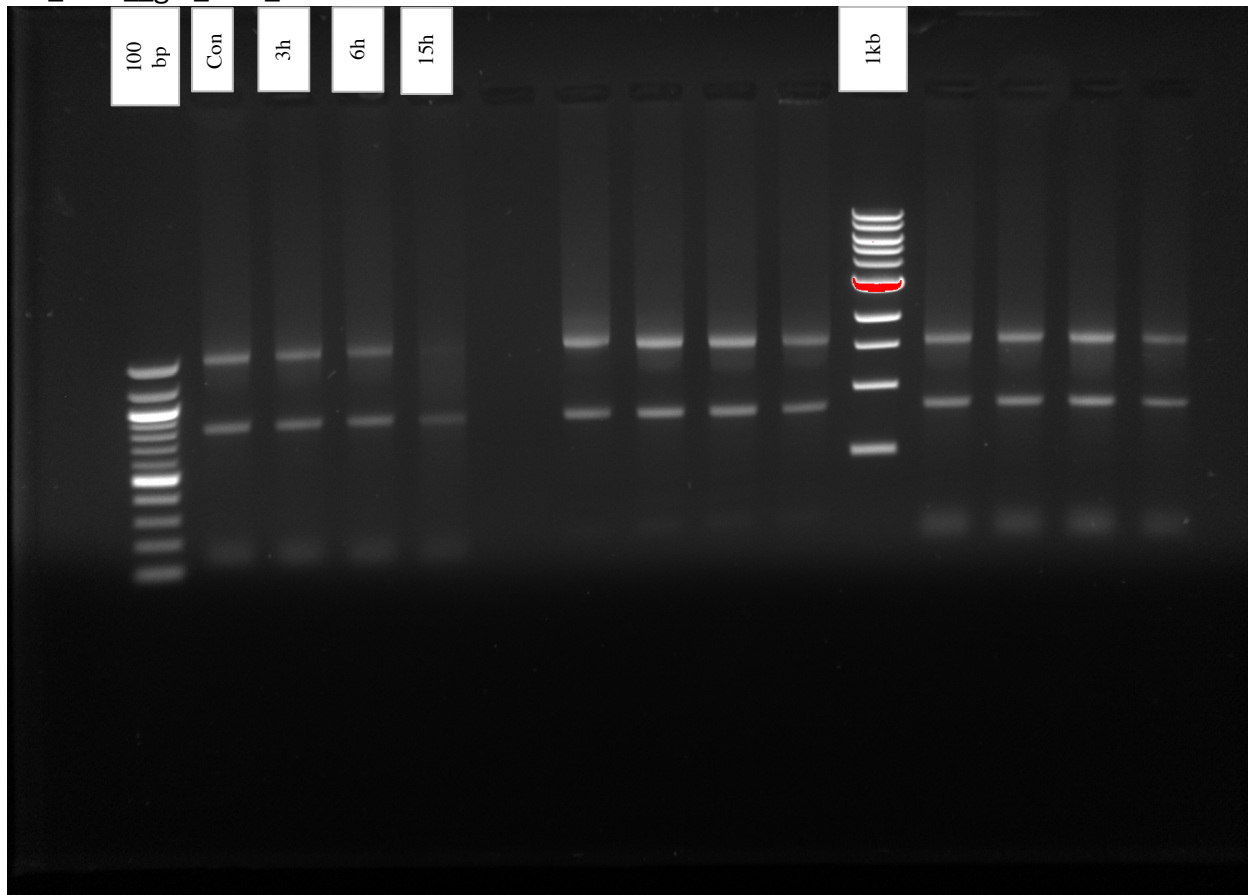

Tot\_RNA\_gel\_37C\_R2

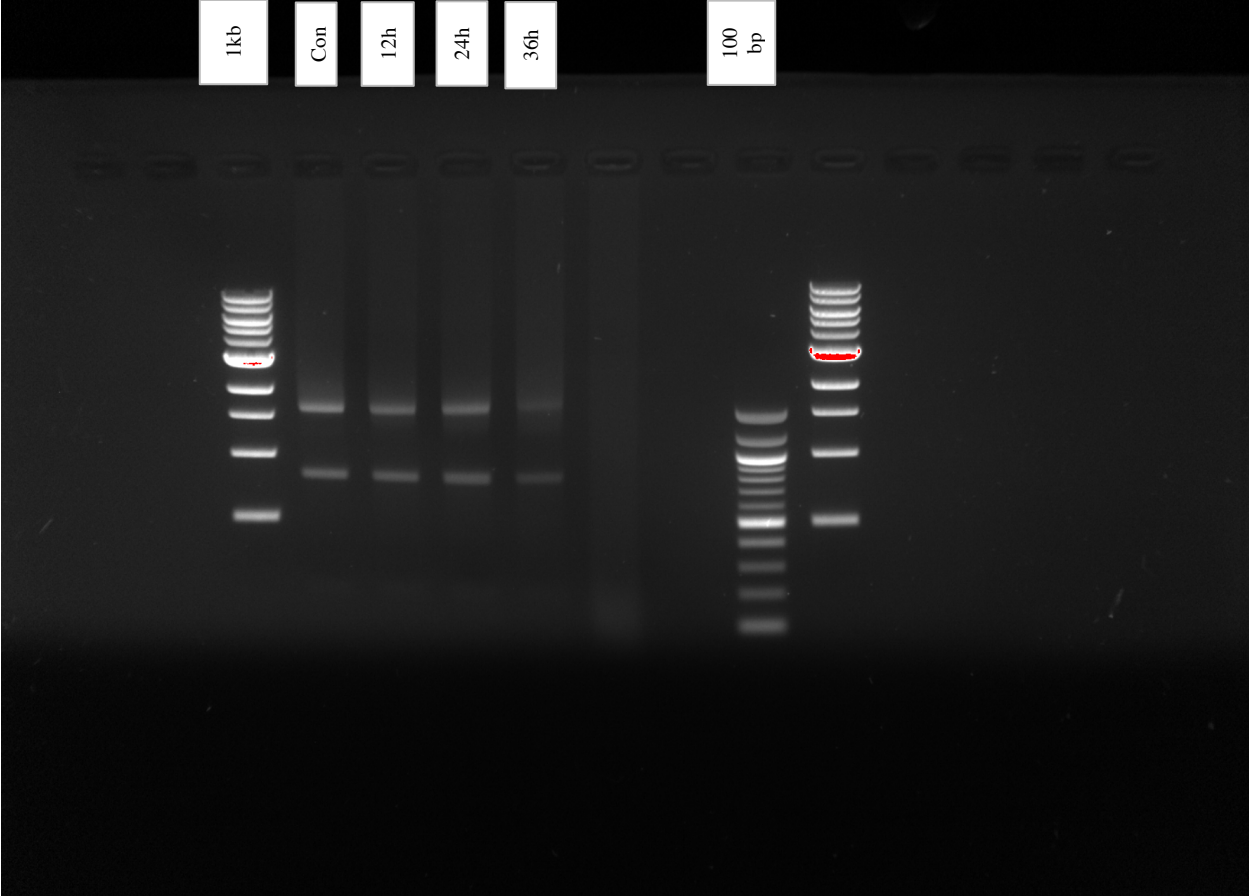

Tot\_RNA\_gel\_45C\_R3

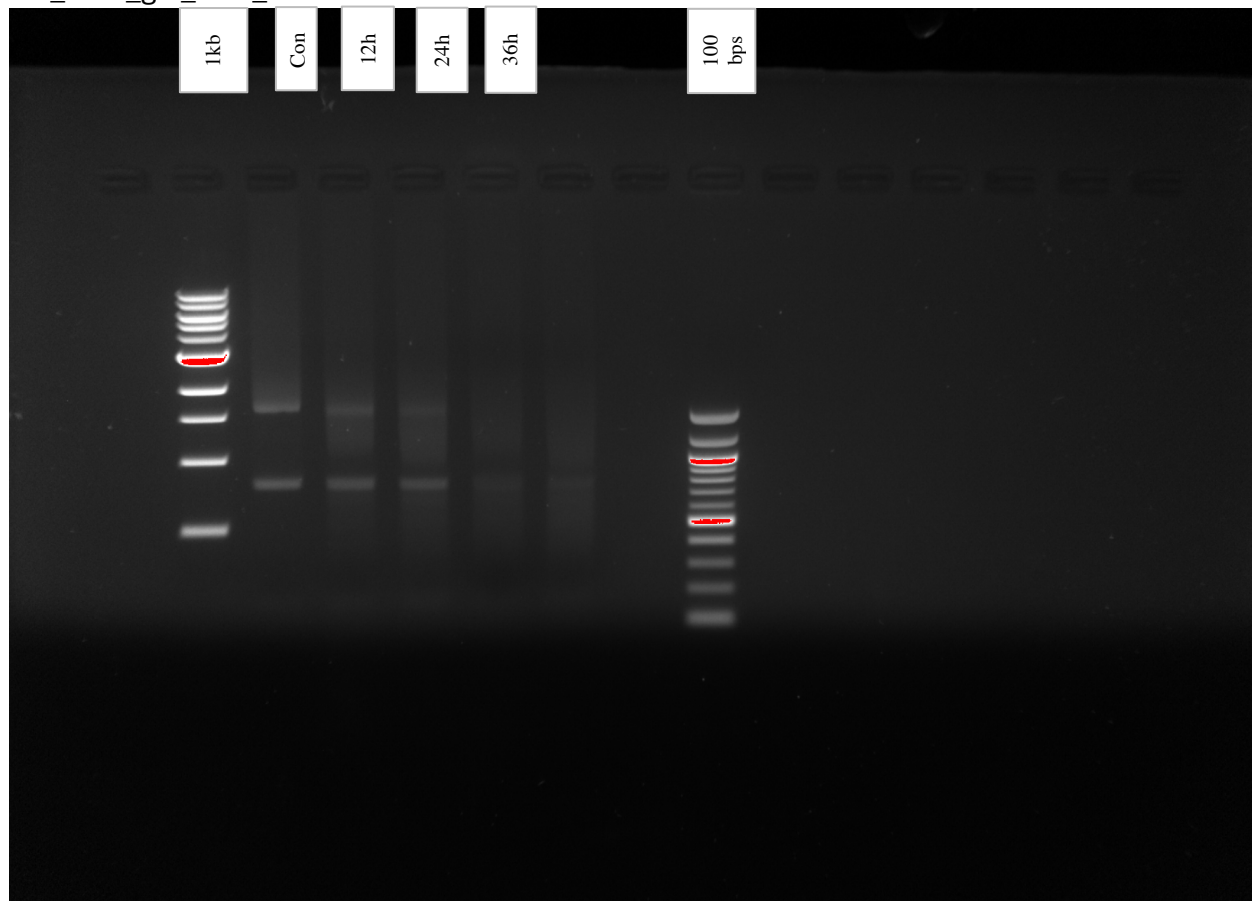



# Tot\_RNA\_BA\_37\_R1

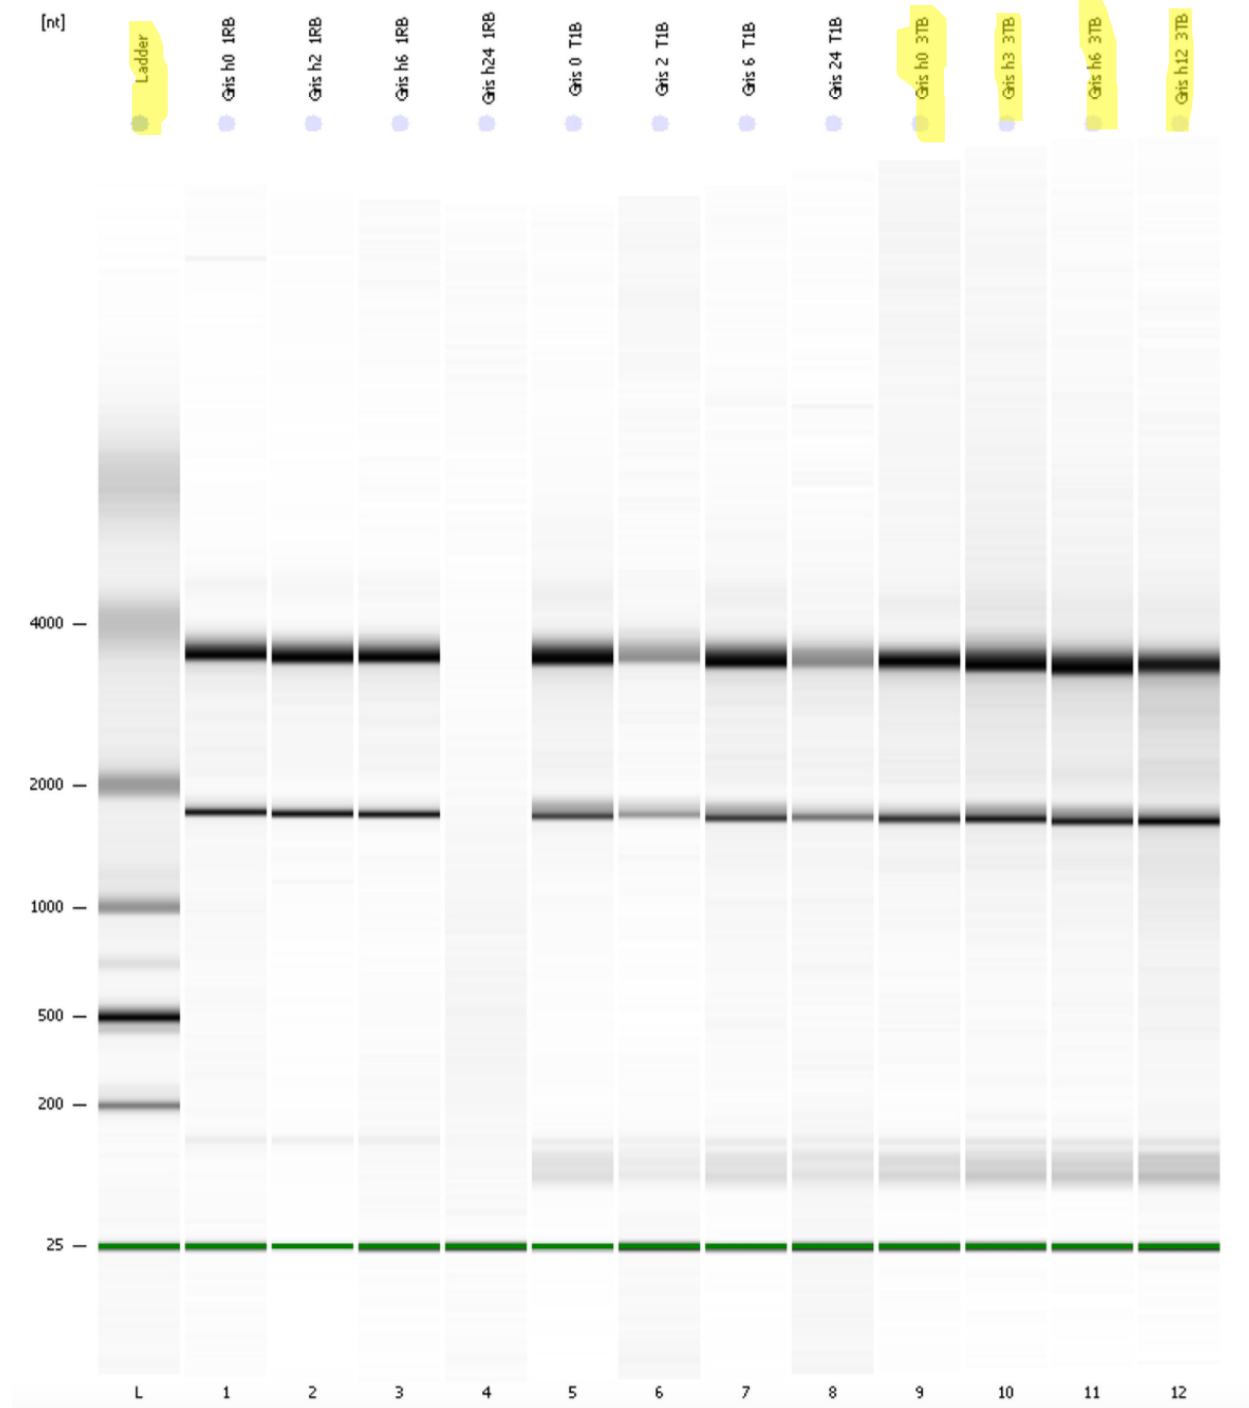

# Tot\_RNA\_BA\_37\_R2

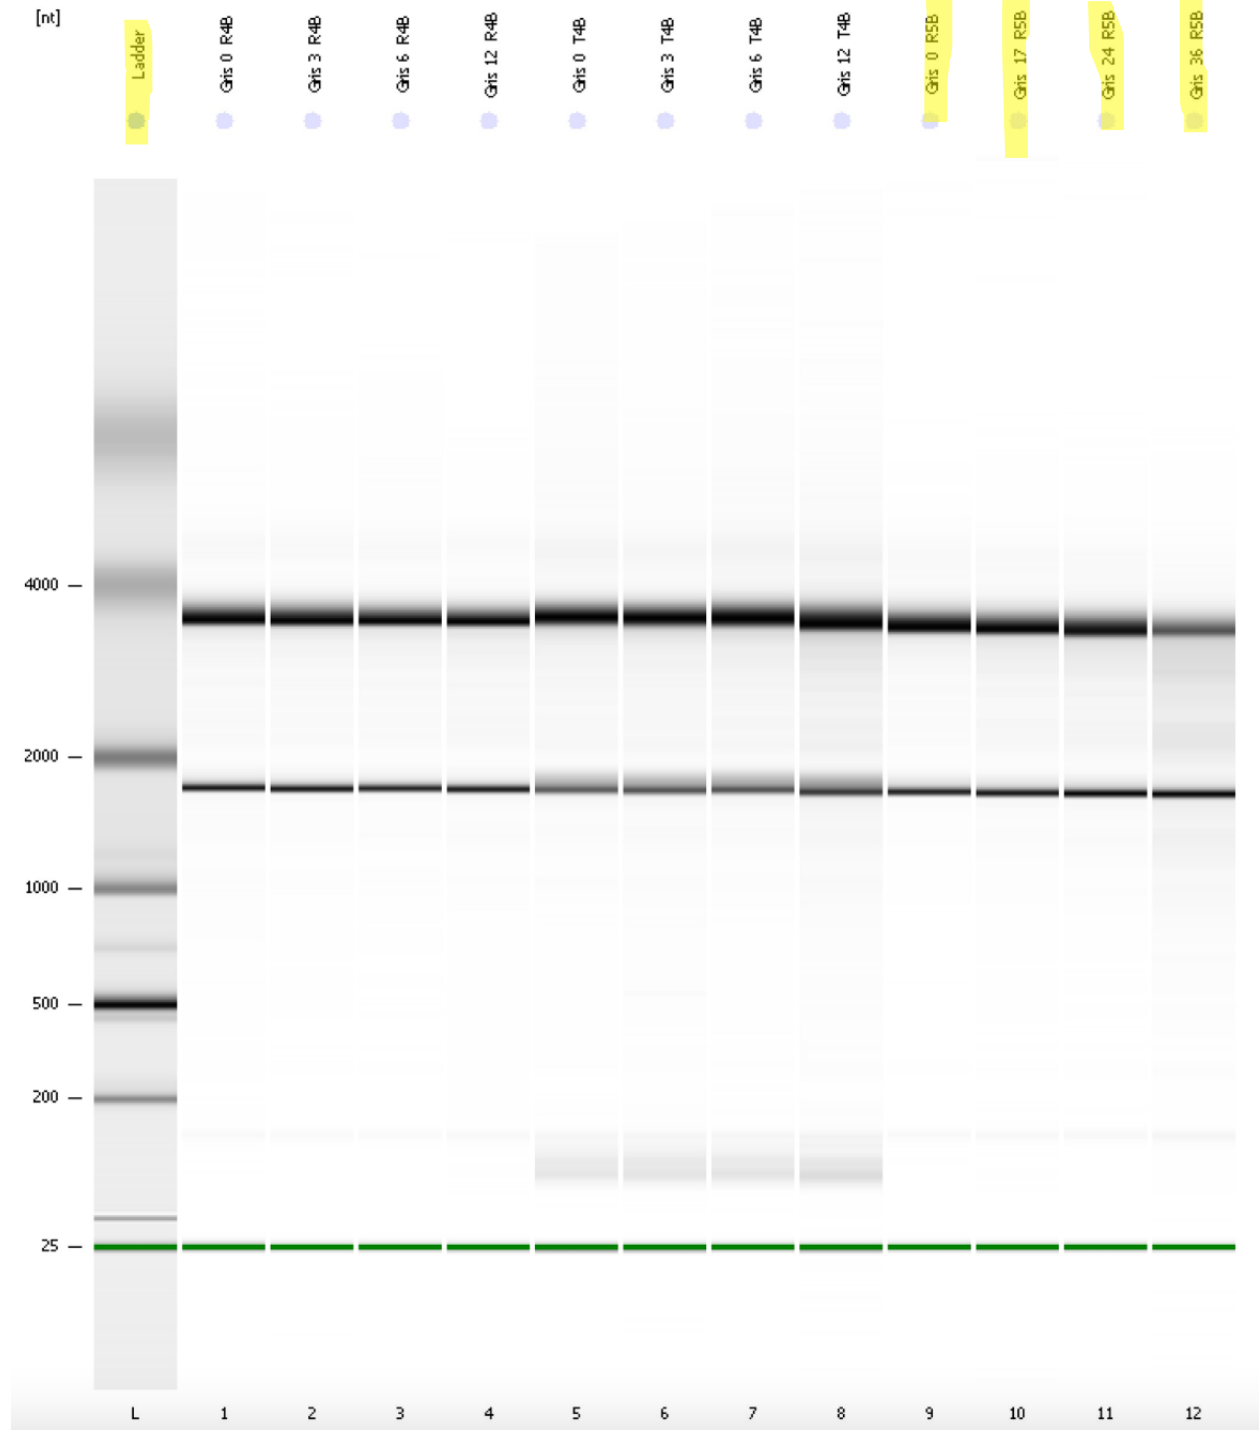

Tot\_RNA\_BA\_37\_R3

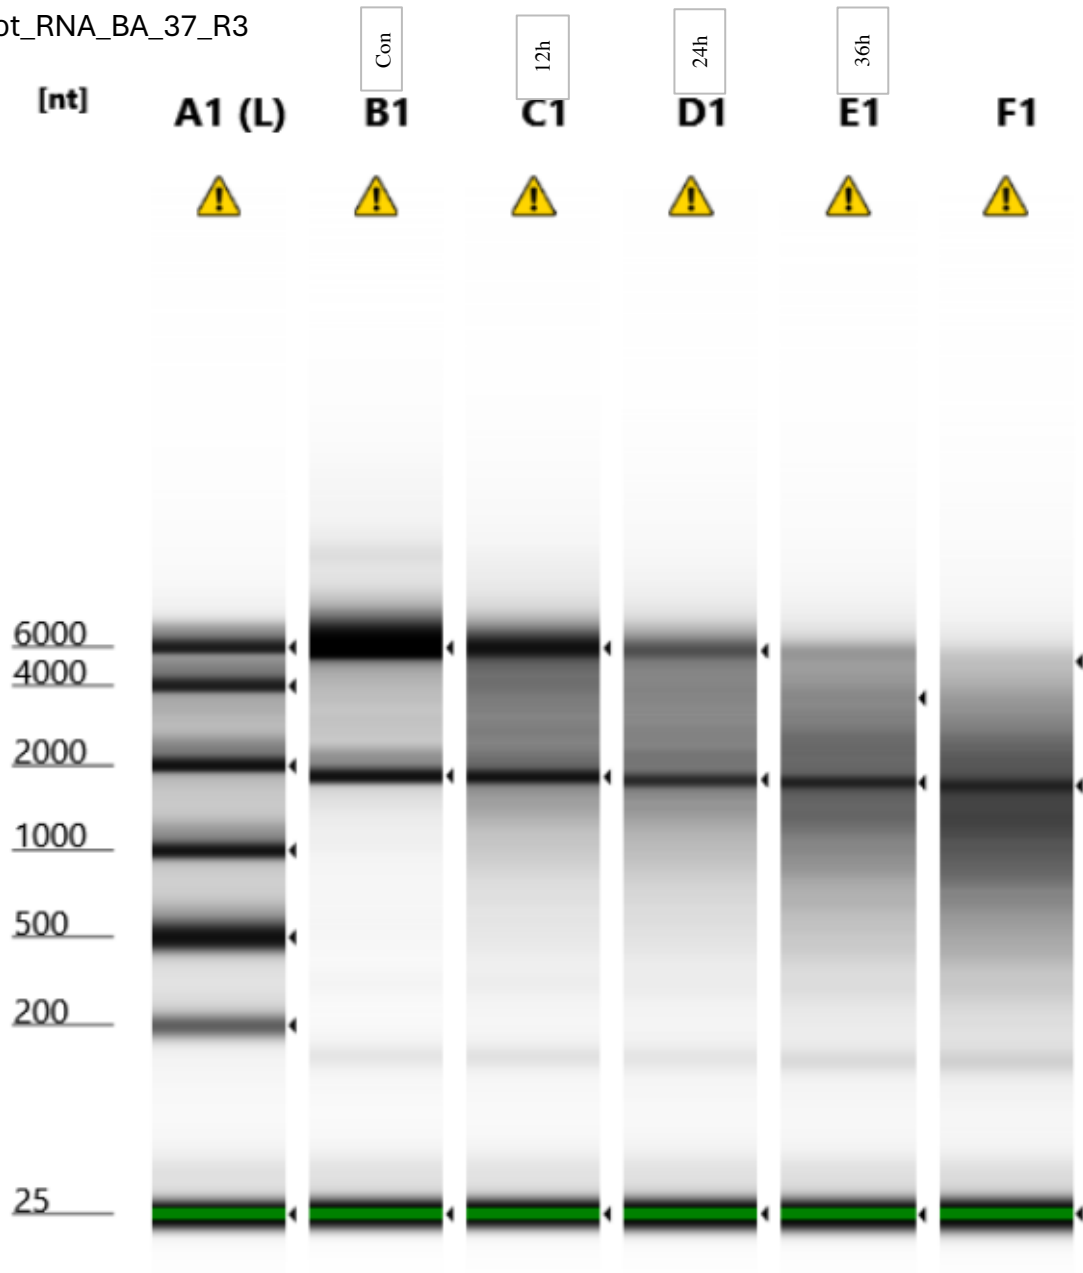

Supplement: pone.0308297.s006.pdf [file pone.0308297.s006.pdf]
